# Supplementary material
Source: Springer Nature journal article supplement (https://www.springermedizin.de/resource/supplementary/12871_2011_108_MOESM3_ESM.pdf/9428850)

# A: Ca(+) ACSF

esmolol 500  $\mu$ M

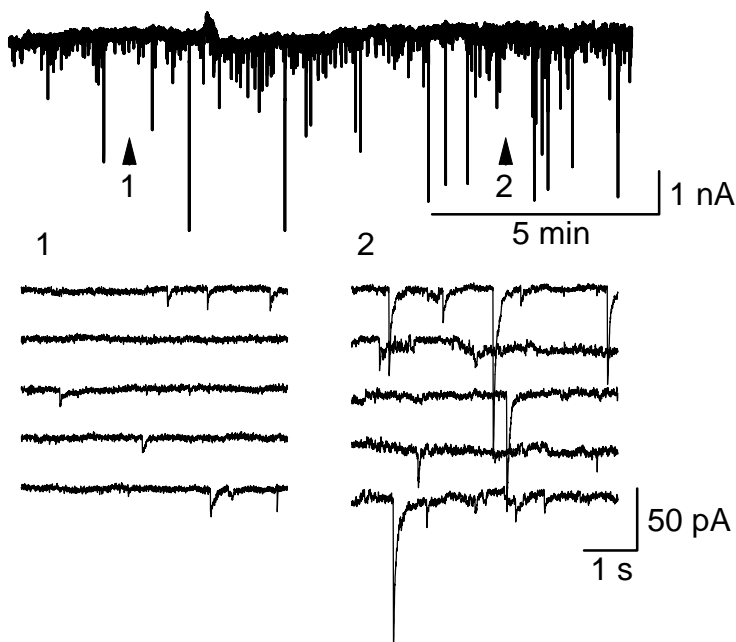

# B: Ca(-) ACSF

esmolol 500  $\mu$ M

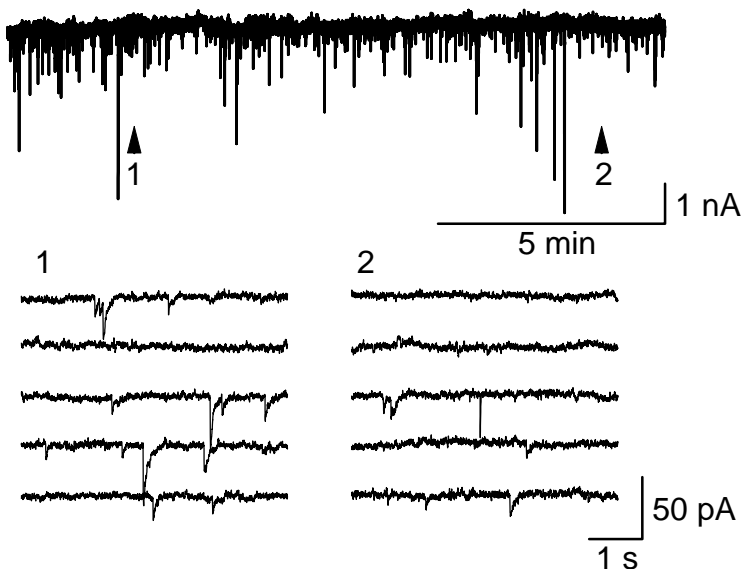

# C

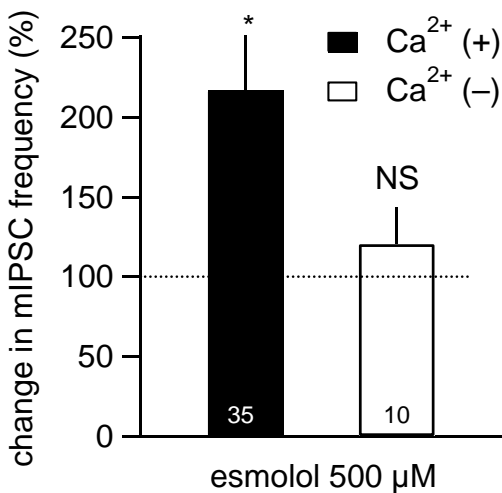

Supplement: MOESM3 [file 9428850]
